# Supplementary material
Source: Royal Society of Chemistry journal article supplement (doi:10.1039/d6cy00350h)
Supplement: d6cy00350h1.pdf [file d6cy00350h1.pdf]

Supplementary Information

## **The Effect of Electrolyte Alkali Cation on CO<sub>2</sub> Electroreduction in Atomically Precise Ag<sub>25</sub>(SR)<sub>18</sub> Nanoclusters**

Yuting Ye<sup>[a] [+]</sup>, Xia Zhou<sup>[b] [+]</sup>, Yuping Chen<sup>[a]</sup>, Likai Wang<sup>\*[b]</sup> and Qing Tang<sup>\*[a]</sup>

[a] School of Chemistry and Chemical Engineering, Chongqing Key Laboratory of Chemical Theory and Mechanism, Chongqing University, Chongqing 401331, China

[b] School of Chemistry and Chemical Engineering, Shandong University of Technology, Zibo, Shandong, 255049, China

[+] These authors contributed equally to this work.

\*To whom correspondence should be addressed. E-mail: lkwangchem@sdut.edu.cn;  
qingtang@cqu.edu.cn

### **Chemicals and materials.**

Silver nitrate (AgNO<sub>3</sub>, AR), tetraoctylammonium bromide (TOAB, 98%), 2,4-dimethylbenzenethiol (HSPHMe<sub>2</sub>, 95%), tetraphenylphosphonium bromide (PPh<sub>4</sub>Br, 98%), Sodium borohydride (NaBH<sub>4</sub>, AR), Potassium chloride (KCl, AR), Sodium Chloride (NaCl, AR), Lithium chloride (LiCl, AR), Nafion solution (5 wt%), tetrahydrofuran (THF, AR), methanol, dichloromethane (CH<sub>2</sub>Cl<sub>2</sub>, AR) and ethanol were used without further purification.

### **Electrochemical measurements.**

The catalytic activity of Ag<sub>25</sub> NCs was obtained using an electrochemical workstation (CHI 760E) with a three-electrode system coupled to a CO<sub>2</sub> flow cell. The electrolyte solutions were 0.5 M NaCl, 0.5 M KCl and 0.5 M LiCl solutions, and the reference electrode was an Ag/AgCl electrode (immersed in saturated KCl solution), an anion-exchange membrane, and a platinum plate used as the ion mobility channel and counter electrode, respectively. The working electrode was prepared as follows: 1

mg carbon nanotube and 1 mg Ag<sub>25</sub> NCs were dissolved in 0.5 mL of CH<sub>2</sub>Cl<sub>2</sub> to achieve a uniform dispersion ink containing 10 μL of 5 wt% Nafion solution, 0.5 mL of the above solution was sprayed onto 1 cm<sup>2</sup> (GDL) with the loading mass of 2 mg/cm<sup>2</sup>.

The cathodic electrolyte was continuously saturated with CO<sub>2</sub> for 30 min before electrochemical CO<sub>2</sub> reduction reaction (eCO<sub>2</sub>RR). The cathode and anode reaction chambers are separated by a proton exchange membrane (Nafion-115) placed in a neutral medium. In the electrocatalytic reduction process, each electrolyte cell contained 30 mL of electrolyte, which was circulated by a peristaltic pump at 40 rpm from the flow chamber to the corresponding electrolyte cell. The gas products were analyzed quantitatively and qualitatively with the aid of a gas chromatograph (GC, Huaai 9560).

The potential in this work is converted to reversible hydrogen electrode (RHE) potential according to the equation:

$$E(RHE) = E(Ag/AgCl) + 0.197V + 0.0591 \times pH$$

Faraday efficiency of gas products was calculated based on the following formula (FE):

$$FE = \frac{Q_i}{Q_{total}} = \frac{N_i \times Z \times F}{Q_{total}}$$

where Q<sub>i</sub> is the charge required to form the gaseous product, Q<sub>total</sub> is the total charge during the reaction, N<sub>i</sub> is the number of moles of the product detected by gas chromatography, Z is the number of electrons transferred during the formation of the product (2 for CO and H<sub>2</sub>), and F is Faraday's constant (96485 C mol<sup>-1</sup>).

Calculation of the turnover frequency (TOF) was as follow:

$$TOF(h^{-1}) = \frac{j_i/ZF}{m_i * \omega/M} \times 3600$$

where j<sub>i</sub> is the partial current density of the corresponding gas product, Z is the number of transferred electrons formed by the product (2 for CO), F is the Faraday constant (96485 C mol<sup>-1</sup>), m<sub>i</sub> is the mass of the loading catalyst, ω is the relative mass fraction of Ag in the catalyst, and M is the relative atomic mass of Ag. Linear sweep voltammetry (LSV) was conducted in a 1 M KOH solution saturated with either N<sub>2</sub> or

CO<sub>2</sub>, using a scan rate of 50 mV s<sup>-1</sup>.

The CO<sub>2</sub>-to-CO conversion overpotentials ( $\eta$ ) were then calculated using the following equation:

$$\eta = E_{SHE} - E_{eq}$$
$$E_{SHE} = E_{RHE} + 0.0591 V$$

Where  $\eta$  is the overpotential (in V),  $E_{eq}$  is the equilibrium potential for CO<sub>2</sub> reduction to CO, which is approximately -0.11 V (vs. the standard hydrogen electrode, SHE).

The Tafel slopes of selective Ag<sub>25</sub> samples for CO<sub>2</sub>RR were obtained from the linear region of the low-overpotential region, using the following equation.

$$\eta = a + b \log |j_{CO}|$$

where  $\eta$  is the overpotential,  $b$  is the Tafel slope,  $j$  is the current density. Linear fitting was performed in the region where  $\log |j_{CO}|$  versus  $\eta$  exhibited linearity, avoiding the mass transport-limited region.

**Free Energy Calculations.** The kinetic barriers are obtained by applying a holonomic constraint on the reaction coordinate ( $\zeta$ ) during constrained AIMD simulations.<sup>1</sup>

For H adsorption on the S site, the distance between S and H atoms is chosen as the collective variable (CV), which is defined by eq 1:

$$CV = \zeta(r) = |r_{OH} - r_{SH}| \quad (1)$$

where  $r_{OH}$  refer to the coordinates of the O atom of H<sub>2</sub>O and the H atom of H<sub>2</sub>O, and  $r_{SH}$  refer to the coordinates of the S atom of Ag<sub>25</sub> and the H atom of H<sub>2</sub>O (\*COOH, \*CO, \*H adsorption; \*H desorption is similar).

For -SCH<sub>3</sub> ligand removal from the metal site, the CV is defined by eq 2:

$$CV = \zeta(r) = |r_{Ag} - r_S| \quad (2)$$

where  $r_{Ag}$  refer to the coordinates of the Ag atom and  $r_S$  refer to the coordinates of the S atom of Ag<sub>25</sub>.

For CO<sub>2</sub> adsorption on the metal site, the CV is defined by eq 3 :

$$CV = \zeta(r) = |r_{Ag} - r_C| \quad (3)$$

where  $r_{\text{Ag}}$  and  $r_{\text{C}}$  refer to the coordinates of the metal atom and the C atom of  $\text{CO}_2$  (\*CO desorption is similar).

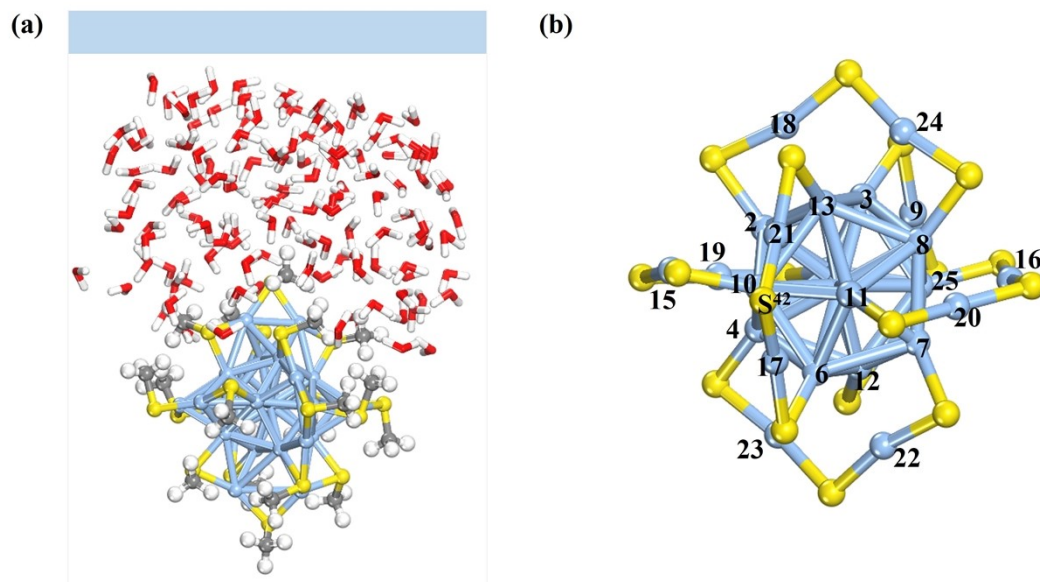

**Figure S1.** Theoretical modeling of  $\text{Ag}_{25}$ /water interface in the neutral system (a) and the metal core structure and corresponding atomic numbers of the  $\text{Ag}_{25}$  (b) cluster. Ag, C, S, O and H atoms are colored with blue, grey, yellow, red and white, respectively (similarly hereinafter).

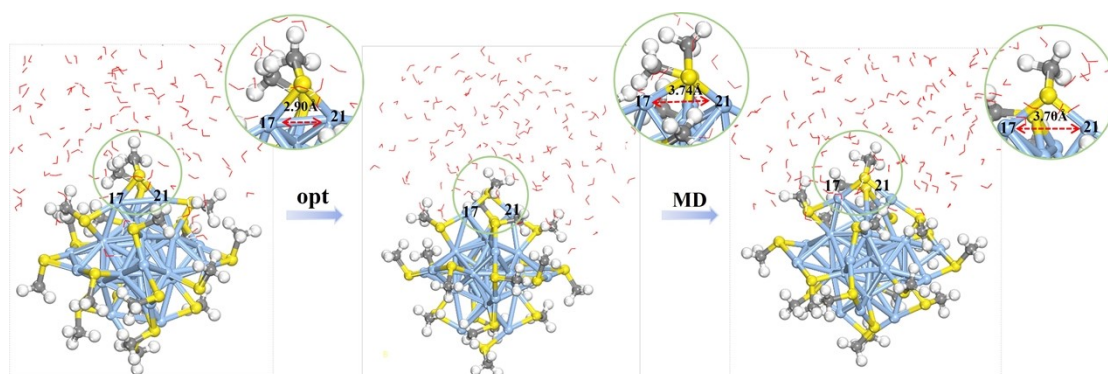

**Figure S2.** Optimization and Dynamic Equilibrium simulation of the  $\text{Ag}_{25}$ /water interface under Cation-Free Conditions.

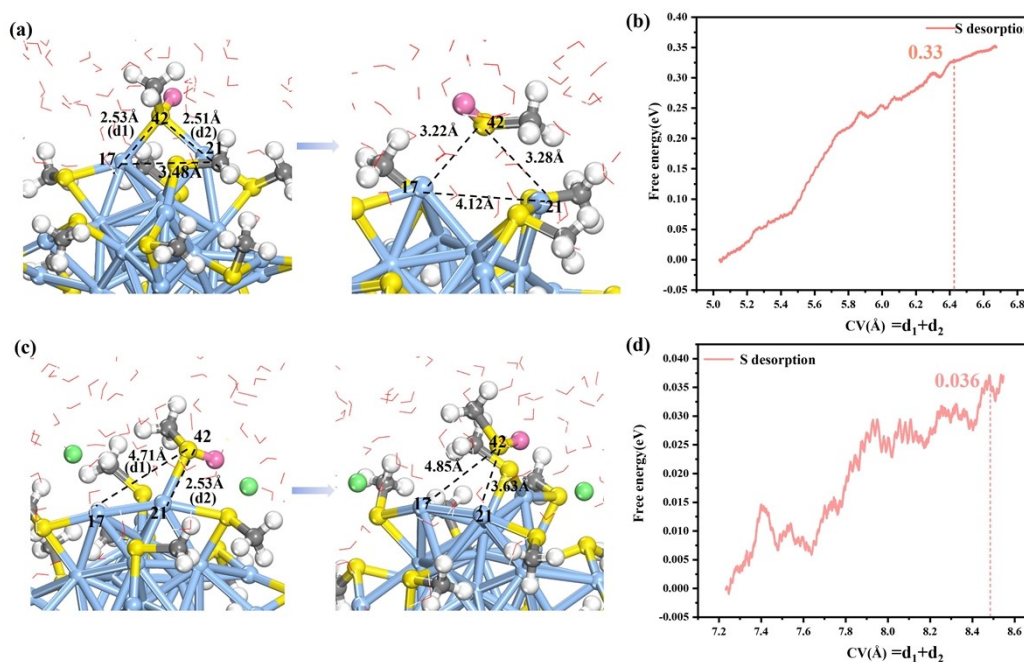

**Figure S3.** Snapshot of S desorption and the corresponding free energy during the SR removal of Ag<sub>25</sub> nanocluster in the water (a, b) and Li<sup>+</sup> (c, d) environment, obtained via constrained AIMD simulations at 300 K under pH=7 conditions. Ag, C, S, O, Li, H and adsorbed H atoms are colored with blue, grey, yellow, red, green, white and pink, respectively (similarly hereinafter).

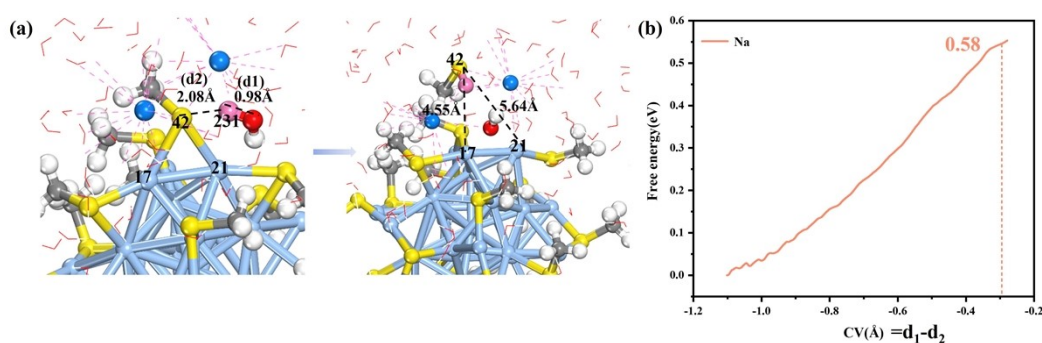

**Figure S4.** Schematic illustration (a) of the SR removal process for Ag<sub>25</sub> nanoclusters in the presence of Na<sup>+</sup>, obtained via constrained AIMD simulations under conditions of pH = 7 and 300 K, along with the corresponding free energy (b). Na<sup>+</sup> is colored with blue.

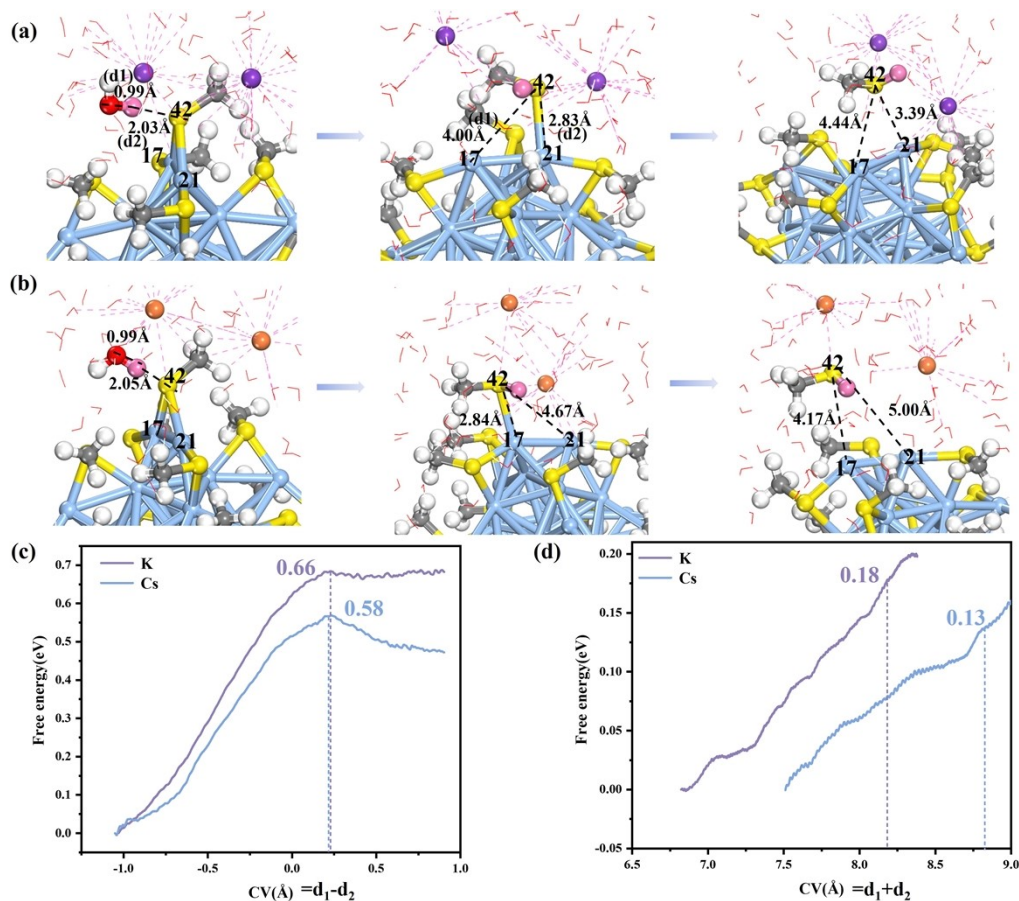

**Figure S5.** Schematic illustration of the SR removal process for Ag<sub>25</sub> nanoclusters in the presence of K<sup>+</sup> (a) and Cs<sup>+</sup> (b); as well as the corresponding free energy of SR removal in K<sup>+</sup> (c) and Cs<sup>+</sup> (d). K<sup>+</sup> and Cs<sup>+</sup> are colored with purple and orange, respectively.

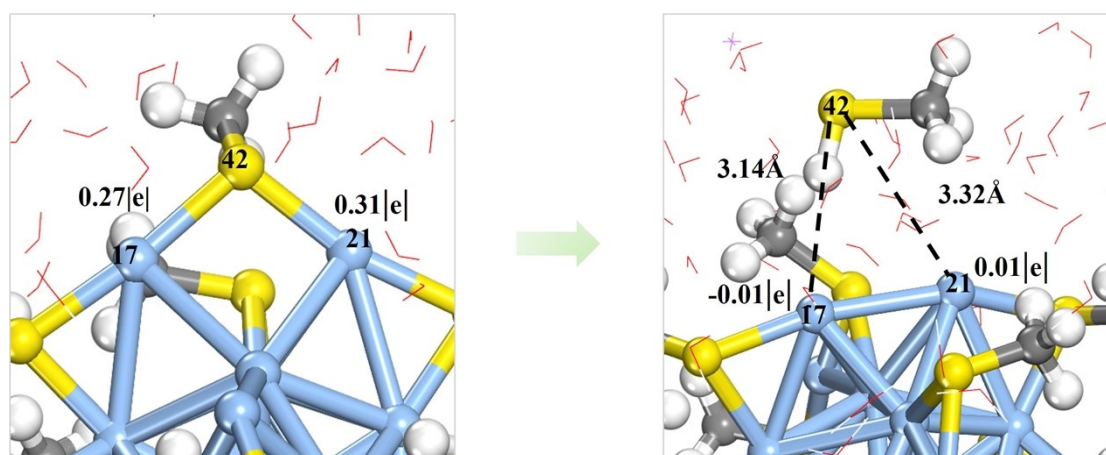

**Figure S6.** Bader charges of Ag<sub>17</sub> and Ag<sub>21</sub> atoms in intact Ag<sub>25</sub>(SCH<sub>3</sub>)<sub>18</sub> and dethiolated Ag<sub>25</sub>(SCH<sub>3</sub>)<sub>17</sub> as well as the corresponding local magnification images.

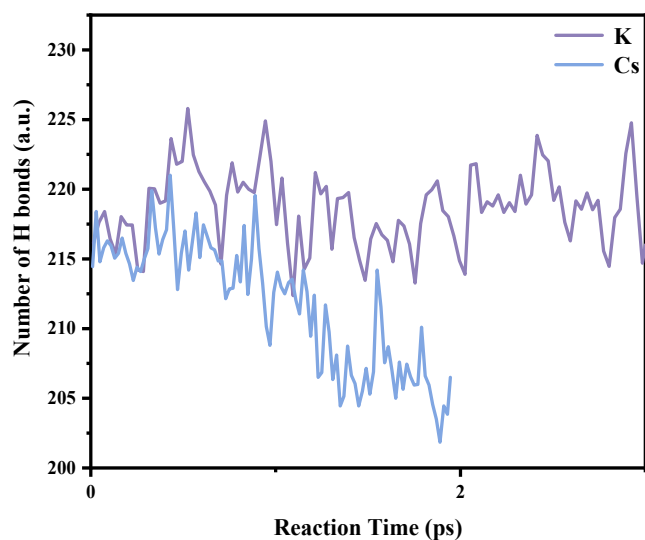

**Figure S7.** Schematic illustration of the number of hydrogen bonds formed during the formation of the \*COOH intermediate in the presence of  $K^+$  and  $Cs^+$ .

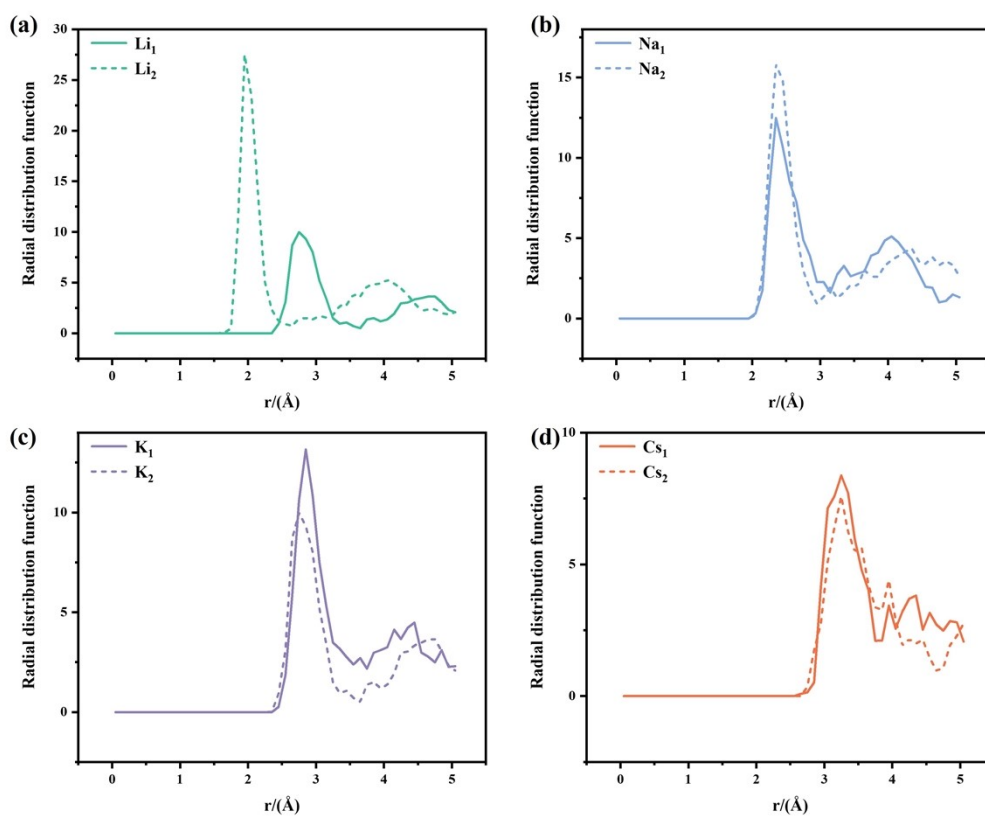

**Figure S8.** The radial distribution functions (RDF) of  $Li^+$  (a),  $Na^+$  (b),  $K^+$  (c), and  $Cs^+$  (d) with oxygen atoms from surrounding  $H_2O$  during the \*COOH formation step (solid and dashed lines

represent  $M_1$  and  $M_2$  in the unified model,  $M$ =cations).

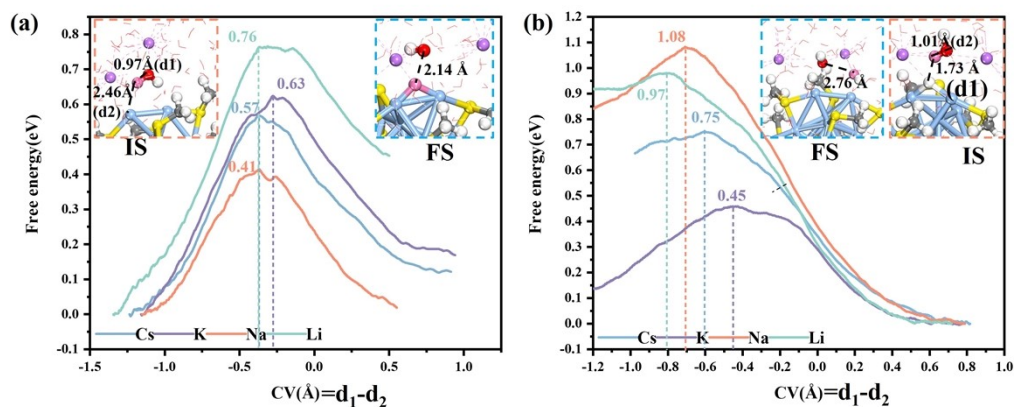

**Figure S9.** Comparison of the integral free energy curves of \*H formation (a) and \*H desorption to form H<sub>2</sub> (b) in the presence of Li<sup>+</sup>, Na<sup>+</sup>, K<sup>+</sup>, and Cs<sup>+</sup> environment by constrained AIMD simulations. The local structures of initial state (IS), final state (FS) and the defined collective variable (CV, d<sub>1</sub>-d<sub>2</sub>) are shown inset.

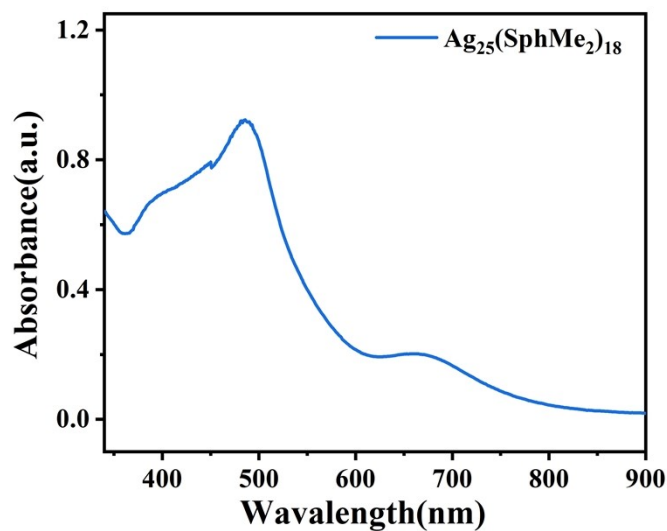

**Figure S10.** UV-vis spectra of Ag<sub>25</sub>(SPhMe<sub>2</sub>)<sub>18</sub>.

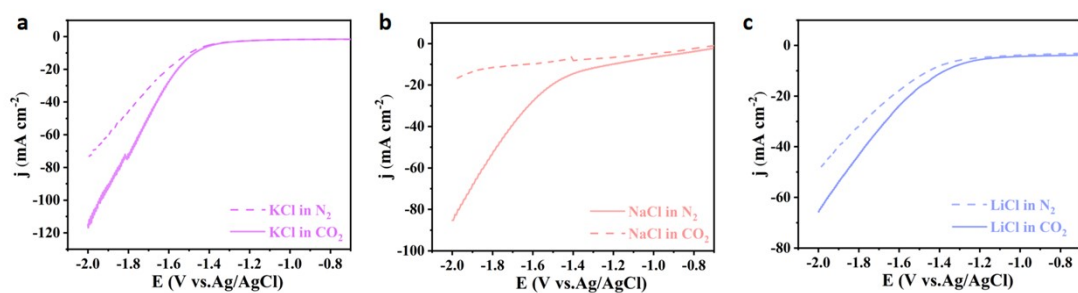

**Figure S11.** LSV measurements of Ag<sub>25</sub> in N<sub>2</sub> and CO<sub>2</sub> conditions with 0.5 M KCl (a), 0.5 M NaCl (b) and 0.5 M LiCl (c).

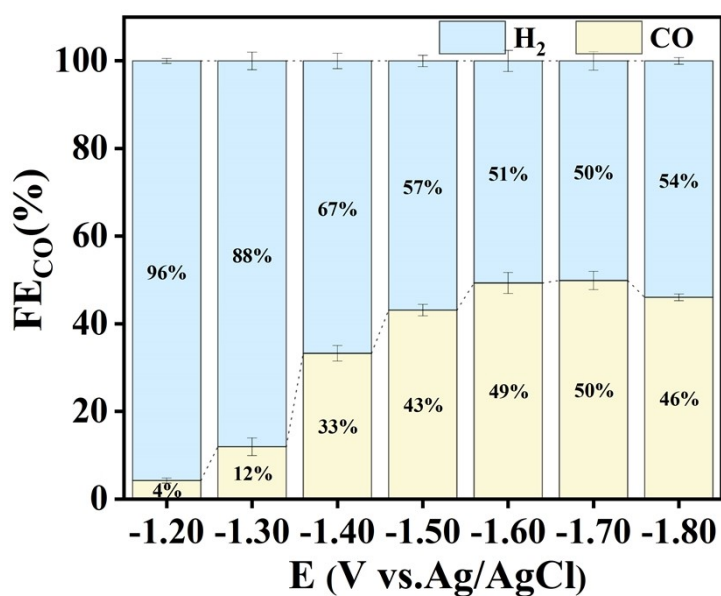

**Figure S12.** FE<sub>CO</sub> of Ag<sub>25</sub> in the flow cell under CO<sub>2</sub> atmosphere with 0.5 M CsCl conditions.

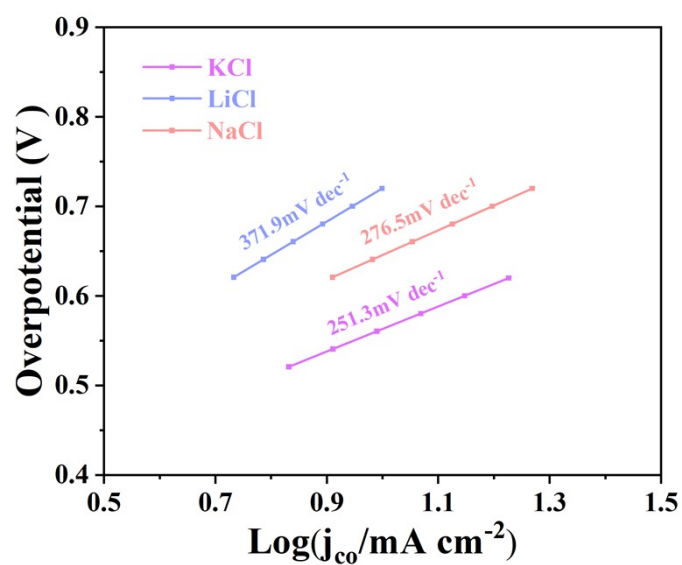

**Figure S13.** Tafel plots of  $\text{Ag}_{25}$  in 0.5 M KCl, NaCl and LiCl electrolytes.

**Table S1.** Bader charges of Ag atoms in intact  $\text{Ag}_{25}(\text{SCH}_3)_{18}$  and dethiolated  $\text{Ag}_{25}(\text{SCH}_3)_{17}$ . The Bader charge of exposed under-coordinated Ag atoms are marked in orange.

| Atom             | Before site<br>removal | After site<br>removal |
|------------------|------------------------|-----------------------|
| $\text{Ag}^1$    | -0.05                  | -0.06                 |
| $\text{Ag}^2$    | 0.10                   | 0.11                  |
| $\text{Ag}^3$    | 0.13                   | 0.09                  |
| $\text{Ag}^4$    | 0.12                   | 0.14                  |
| $\text{Ag}^5$    | 0.13                   | 0.12                  |
| $\text{Ag}^6$    | 0.12                   | 0.08                  |
| $\text{Ag}^7$    | 0.13                   | 0.08                  |
| $\text{Ag}^8$    | 0.12                   | 0.10                  |
| $\text{Ag}^9$    | 0.14                   | 0.11                  |
| $\text{Ag}^{10}$ | 0.11                   | 0.09                  |
| $\text{Ag}^{11}$ | 0.11                   | 0.11                  |
| $\text{Ag}^{12}$ | 0.14                   | 0.16                  |

|                  |      |       |
|------------------|------|-------|
| Ag <sup>13</sup> | 0.27 | 0.27  |
| Ag <sup>14</sup> | 0.28 | 0.24  |
| Ag <sup>15</sup> | 0.27 | 0.30  |
| Ag <sup>16</sup> | 0.32 | 0.27  |
| Ag <sup>17</sup> | 0.27 | -0.01 |
| Ag <sup>18</sup> | 0.30 | 0.29  |
| Ag <sup>19</sup> | 0.29 | 0.28  |
| Ag <sup>20</sup> | 0.15 | 0.09  |
| Ag <sup>21</sup> | 0.31 | 0.01  |
| Ag <sup>22</sup> | 0.30 | 0.27  |
| Ag <sup>23</sup> | 0.28 | 0.27  |
| Ag <sup>24</sup> | 0.28 | 0.28  |
| Ag <sup>25</sup> | 0.27 | 0.26  |

## References

- (1) Cao, H.; Zhang, Z.; Chen, J.-W.; Wang, Y.-G. Potential-dependent free energy relationship in interpreting the electrochemical performance of CO<sub>2</sub> reduction on single atom catalysts. *ACS Catal.* **2022**, *12* (11), 6606-6617.
